# Supplementary material for: Effect of surface species and structure on the performance of CeO2 and SO42− doped MCM-41 catalyst toward NH3-SCR
Source: Royal Society of Chemistry journal article supplement (doi:10.1039/c6ra09505d), 2016-01-01
Supplement: c6ra09505d1.pdf [file c6ra09505d1.pdf]

*Supplementary Material for*

**Effect of surface species and structure on the performance of CeO<sub>2</sub>  
and SO<sub>4</sub><sup>2-</sup> doped MCM-41 catalyst toward NH<sub>3</sub>-SCR**

Zhongxian Song <sup>a</sup>, Xiang Wu <sup>b</sup>, Qiulin Zhang <sup>a\*</sup>, Ping Ning <sup>a\*\*</sup>, Jie Fan <sup>a</sup>, Xin Liu <sup>a</sup>,  
Qixian Liu <sup>a</sup>, Zhenzhen Huang <sup>c</sup>

*(<sup>a</sup>Faculty of Environmental Science and Engineering, Kunming University of Science and Technology, Kunming, 650500, P.R. China; <sup>b</sup>Yunnan TianAn Chemical Co., Ltd., Anning, 650309, P.R. China; <sup>c</sup>College of Environmental Science and Engineering, Hunan University, Changsha 410082, P.R. China)*

\* Corresponding author. Tel:+ 86-871-65170905.

E-mail address:qiulinzhang\_kmust@163.com; ningping\_58@126.com

The S2p XPS spectra of the Cat-A, Cat-B and Cat-C were shown in Fig. S1. In contrast with the Cat-C catalyst, the Cat-A and Cat-B catalyst showed a weak peak at 168-169 eV, respectively, which corresponded to formation of surface SO<sub>4</sub><sup>2-</sup> species. However, the intensity of surface SO<sub>4</sub><sup>2-</sup> species was so weak that it could be not detected by XPS. The phenomenon indicated that no surface S species existed at the outer surface or at the entrance of the pores over the Cat-A, Cat-B and Cat-C.

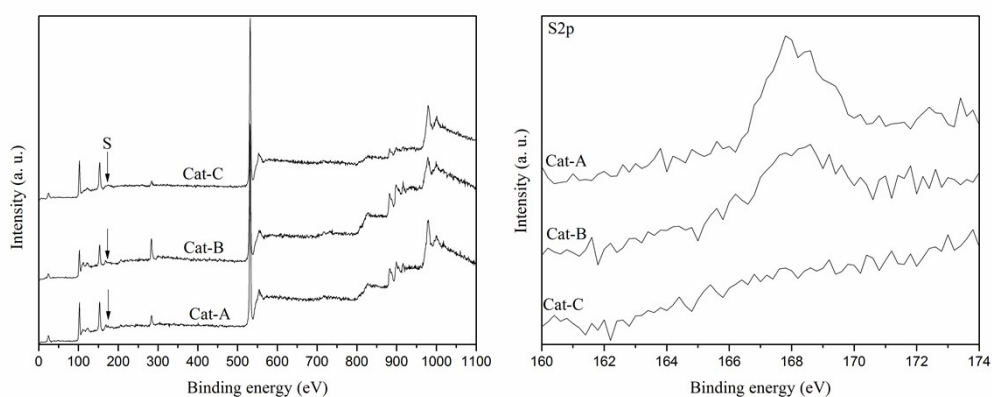

**Fig. S1** S2p XPS spectra of the catalysts.
